# Supplementary material for: Clinical Differentiation of Severe Fever with Thrombocytopenia Syndrome from Japanese Spotted Fever
Source: MDPI journal article supplement (doi:10.3390/v14081807), 2022-08-18
Supplement: s1 [file s1]

## Supplementary materials

**Table S1. Outcomes, complications and treatments of patients with JSF and SFTS**

|                                          | all<br>(n = 61) | SFTS<br>(n = 23) | JSF<br>(n = 38) | P value   |
|------------------------------------------|-----------------|------------------|-----------------|-----------|
| <b>Outcomes</b>                          |                 |                  |                 |           |
| In-hospital death                        | 6 (9.8)         | 6 (26.1)         | 0 (0.0)         | 0.002 †   |
| Length of hospital stay (days)           | 23.1 ± 39.3     | 34.5 ± 57.7      | 15.9 ± 18.1     | 0.015 †   |
| ICU admission                            | 10 (16.4)       | 7 (30.4)         | 3 (7.9)         | 0.032 †   |
| <b>Complications</b>                     |                 |                  |                 |           |
| Secondary bacterial infection            | 8 (13.1)        | 6 (26.1)         | 2 (5.3)         | 0.044 †   |
| Secondary fungal infection               | 5 (8.2)         | 4 (17.4)         | 1 (2.6)         | 0.062     |
| meningitis                               | 2 (3.3)         | 1 (4.4)          | 1 (2.6)         | 1.000     |
| Hemophagocytic lymphohistiocytosis (HLH) | 11/60 (18.3)    | 11/23 (47.8)     | 0/37 (0.0)      | < .0001 † |
| DIC                                      | 32 (52.5)       | 16 (69.6)        | 16 (42.1)       | 0.063     |
| <b>Treatments</b>                        |                 |                  |                 |           |
| Tetracycline                             | 55 (90.2)       | 17 (73.9)        | 38 (100.0)      | 0.002 †   |
| Quinolone                                | 27 (44.3)       | 15 (65.2)        | 12 (31.6)       | 0.016 †   |
| Favipiravir                              | 5 (8.2)         | 5 (21.7)         | -               | -         |
| Ribavirin                                | 2 (3.3)         | 2 (8.7)          | -               | -         |
| Corticosteroids                          | 11 (18.0)       | 9 (39.1)         | 2 (5.3)         | 0.002 †   |
| G-CSF                                    | 7 (11.5)        | 7 (30.4)         | 0 (0.0)         | 0.001 †   |
| Intravenous immunoglobulin               | 8/37 (13.3)     | 6/23 (26.1)      | 2/60 (5.4)      | 0.045 †   |
| Thrombomodulin                           | 22 (36.1)       | 12 (52.2)        | 10 (26.3)       | 0.056     |
| Use of vasopressors                      | 12 (19.7)       | 7 (30.4)         | 5 (13.2)        | 0.182     |
| Oxygen therapy                           | 11/60 (18.3)    | 7/23 (30.4)      | 4/37 (10.8)     | 0.086     |
| Mechanical ventilation                   | 8/60 (13.3)     | 6/22 (27.3)      | 2/38 (5.3)      | 0.042 †   |
| Hemodialysis                             | 3 (4.9)         | 2 (8.7)          | 1 (2.6)         | 0.551     |
| CHDF                                     | 4 (6.6)         | 3 (13.0)         | 1 (2.6)         | 0.146     |
| Plasmapheresis                           | 3 (4.9)         | 2 (8.7)          | 1 (2.6)         | 0.551     |

Data are presented as the number of patients (%) or mean ± SD. Abbreviations: SFTS, severe fever with thrombocytopenia syndrome; JSF, Japanese spotted fever; DIC, disseminated intravascular coagulation; ICU, intensive care unit; G-CSF, granulocyte colony-stimulating factor; CHDF, continuous hemodiafiltration. † Significant difference level: 0.05.

**Table S2. Sensitivity, specificity, positive predictive value and negative predictive value for differentiating SFTS from JSF**

|                                      | AUC   | Sensitivity | Specificity | PPV   | NPV   |
|--------------------------------------|-------|-------------|-------------|-------|-------|
| Altered mental status                | 0.699 | 0.609       | 0.790       | 0.636 | 0.769 |
| Diarrhea                             | 0.709 | 0.524       | 0.895       | 0.733 | 0.773 |
| Absence of skin rash                 | 0.826 | 0.571       | 1.000       | 1.000 | 0.826 |
| Absence of tick bite                 | 0.730 | 0.455       | 0.889       | 0.750 | 0.780 |
| WBC < 4000 (/μL)                     | 0.978 | 0.957       | 1.000       | 1.000 | 0.974 |
| Neutrophil < 2042 (/μL)              | 0.957 | 0.913       | 1.000       | 1.000 | 0.949 |
| Atypical lymphocyte (≥3%)            | 0.609 | 0.217       | 1.000       | 1.000 | 0.673 |
| Platelet < 64 ×10 <sup>3</sup> (/μL) | 0.743 | 0.696       | 0.790       | 0.667 | 0.811 |
| AST ≥ 261 (IU/L)                     | 0.756 | 0.565       | 0.947       | 0.867 | 0.783 |
| ALT ≥ 57 (IU/L)                      | 0.733 | 0.783       | 0.684       | 0.600 | 0.839 |
| LDH ≥ 771 (IU/L)                     | 0.783 | 0.684       | 1.000       | 1.000 | 0.792 |
| CRP < 1.78 (mg/dL)                   | 0.935 | 0.870       | 1.000       | 1.000 | 0.927 |
| APTT ≥ 36.5 (s)                      | 0.746 | 0.870       | 0.622       | 0.588 | 0.885 |

Abbreviations: SFTS, severe fever with thrombocytopenia syndrome; JSF, Japanese spotted fever; WBC, white blood cell; AST, aspartate aminotransferase; ALT, alanine transaminase; LDH, lactate dehydrogenase; CRP, C-reactive protein; APTT, activated partial thromboplastin; PPV, positive predictive value; NPV, negative predictive value.

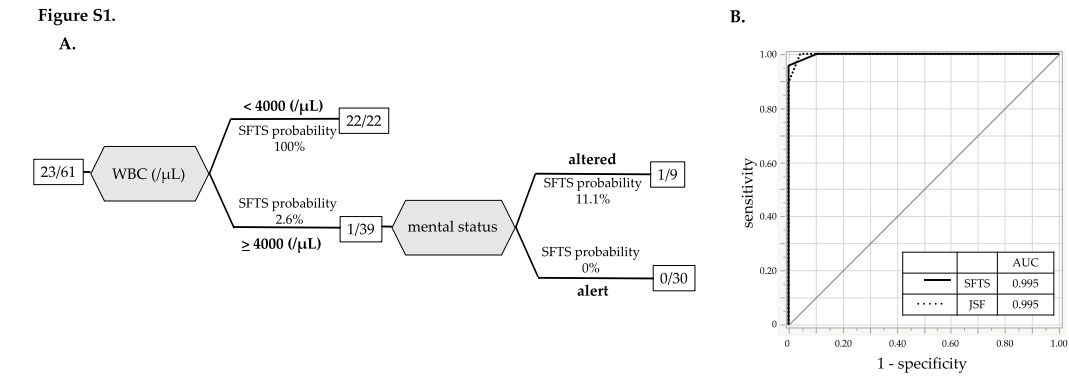

**Figure S1. A.** Decision tree classification of SFTS and JSF based on laboratory data and physical examination. The number in the square is the number of SFTS patients/total patients. **B.** Receiver operating characteristic curve analysis of differentiating SFTS and JSF by decision tree based on supplementary figure 1A.

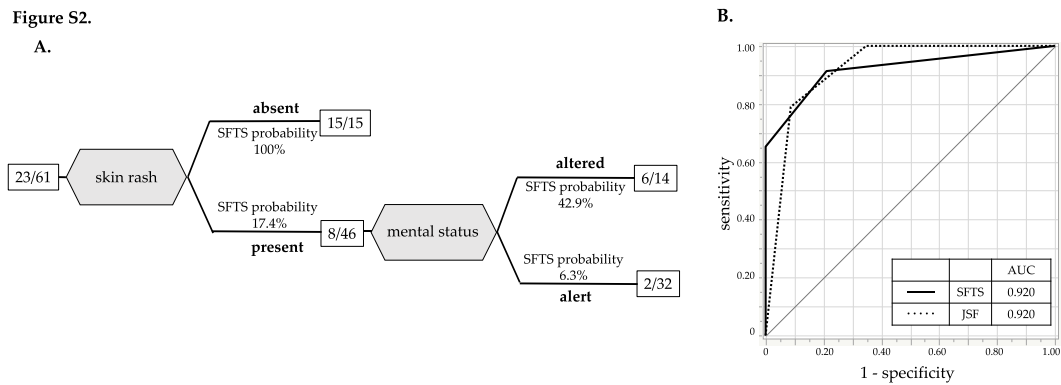

**Figure S2. A.** Decision tree classification of SFTS and JSF based on physical examination. The number in the square is the number of SFTS patients/total patients. **B.** Receiver operating characteristic curve analysis of differentiating SFTS and JSF by decision tree based on supplementary figure 2A.
